# Supplementary material
Source: Research Square preprint supplement (doi:10.21203/rs.3.rs-8969358/v1)
Supplement: Supplementary file 1 [file 5c775b489b5722549de77dbb.xlsx]

## Sheet: Sheet1
ID	Phenotype	Gene	Genotype	Class	SV	Effect	100KGP	gnomAD	Gender	ACMG
P3	Retinal dystrophy, central scotoma, visual impairment, nonprogressive visual loss and reduced visual acuity	OCA2	Homozygous	Deletion	g.27823041_27849013del (25973 bp)	Out-of-frame deletion of exon 23	2/71408	0	F	Likely pathogenic
P4	Nonprogressive visual loss, central scotoma, visual impairment, macular atrophy and reduced visual acuity	OCA2	Compound heterozygous	Deletion	g.28017720_28020677delinsTTT (2958 bp)	Out-of-frame deletion of exon 7	30/71408	0	F	Pathogenic
				Missense	c.2228C>T, p.(Pro743Leu)	-	-	287/1613590		Pathogenic
P5	Visual impairment and foveal hypoplasia	OCA2	Compound Heterozygous	Deletion	g.28017720_28020677delinsTTT (2958 bp)	Out-of-frame deletion of exon 7	30/71408	0	M	Pathogenic
				Missense	c.2323G>C, p.(Gly775Arg)	-	-	6/1613792		Pathogenic
P6	Nonprogressive visual loss, retinal dystrophy, visual impairment, central scotoma and macular atrophy	GPR143	Hemizygous	Deletion	g.9476905_9954651del (477747 bp)	Gene deletion	14/71408	0	M	Pathogenic
P7	Nonprogressive visual loss, retinal dystrophy, reduced visual acuity, central scotoma and visual impairment	GPR143	Hemizygous	Deletion	g.9476905_9954651del (477747 bp)	Gene deletion	14/71408	0	M	Pathogenic
P8	Visual impairment, retinal dystrophy, reduced visual acuity, central scotoma and nonprogressive visual loss	GPR143	Hemizygous	Deletion	g.9743119_10024473del (281355 bp)	Deletion of exon 1-6	1/71408	0	M	Likely pathogenic
P9	Visual impairment, retinal dystrophy, central scotoma and nonprogressive visual loss	GPR143	Hemizygous	Deletion	g.9760253_9761254del (1002 bp)	Out-of-frame deletion of exon 2	1/71408	0	M	Likely pathogenic
P10	Aniridia	PAX6	Heterozygous	Deletion	g.31393557_31812922del (419366 bp)	Gene deletion	1/71408	0	M	Pathogenic
P11	Aniridia	PAX6	Heterozygous	Deletion	g.28833790_37084393del (8250604 bp)	Gene deletion	1/71408	0	F	Pathogenic
P12	Nystagmus and visual impairment	SLC38A8	Homozygous	Inversion	g.84015931_84027116inv (11186 bp)	Inversion of exon 7-9	1/71408	0	F	Pathogenic
P13	Visual impairment, abnormal light adapted electroretinogram, nonprogressive visual loss and reduced visual acuity	CACNA1F	Hemizygous	Deletion	g.49224054_49226365del (2312 bp)	In-frame deletion of exon 12-14	2/71408	0	M	VUS
